# Supplementary material
Source: ML conference proceedings conference paper supplement (https://openreview.net/forum?id=AghtKxDf7f)

Y

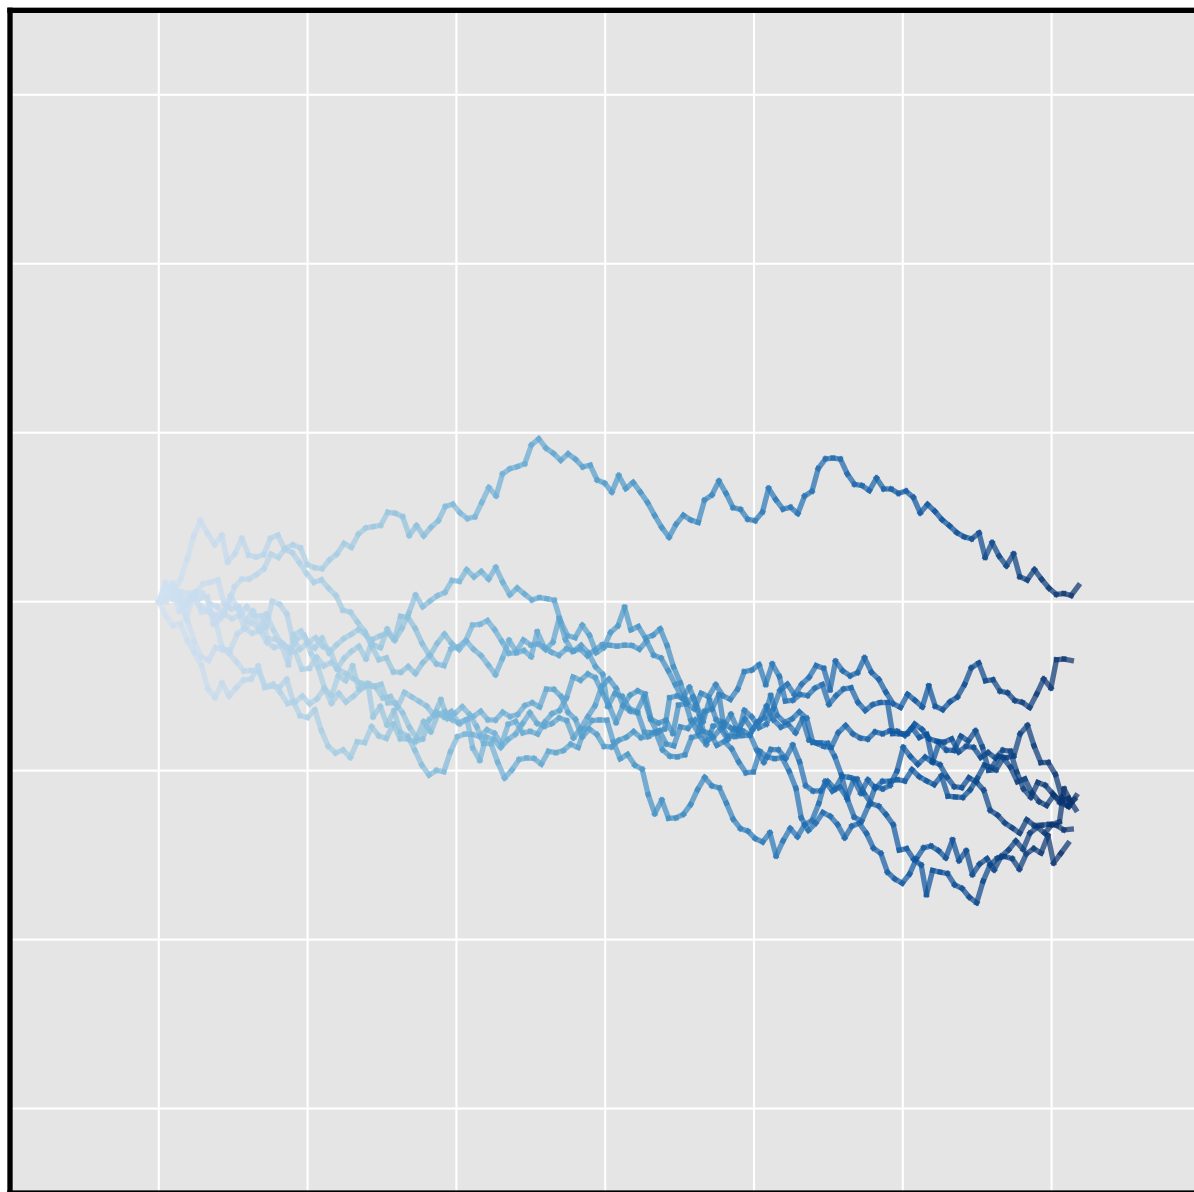

X

Supplement: supplementary_material [file expected_behavior.pdf › code/opelab/examples/simple_overlap/outputs/expected_behavior.pdf]

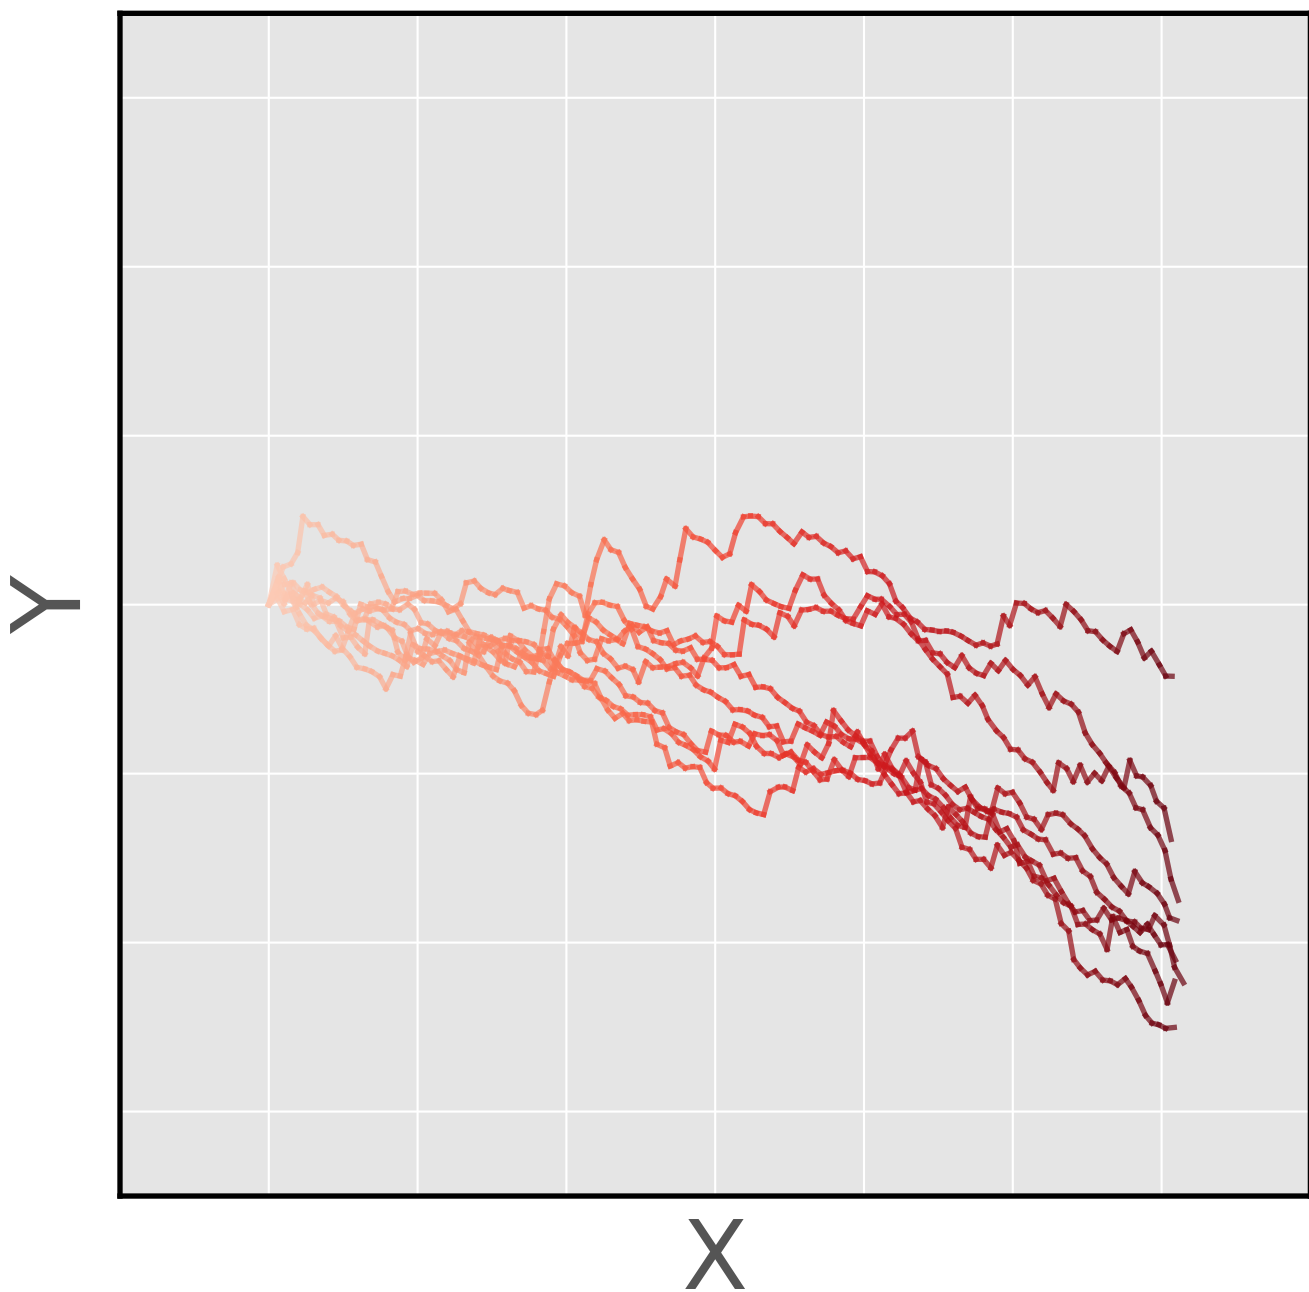

Supplement: supplementary_material [file samples_neg_grad.pdf › code/opelab/examples/simple_overlap/outputs/samples_neg_grad.pdf]

Y

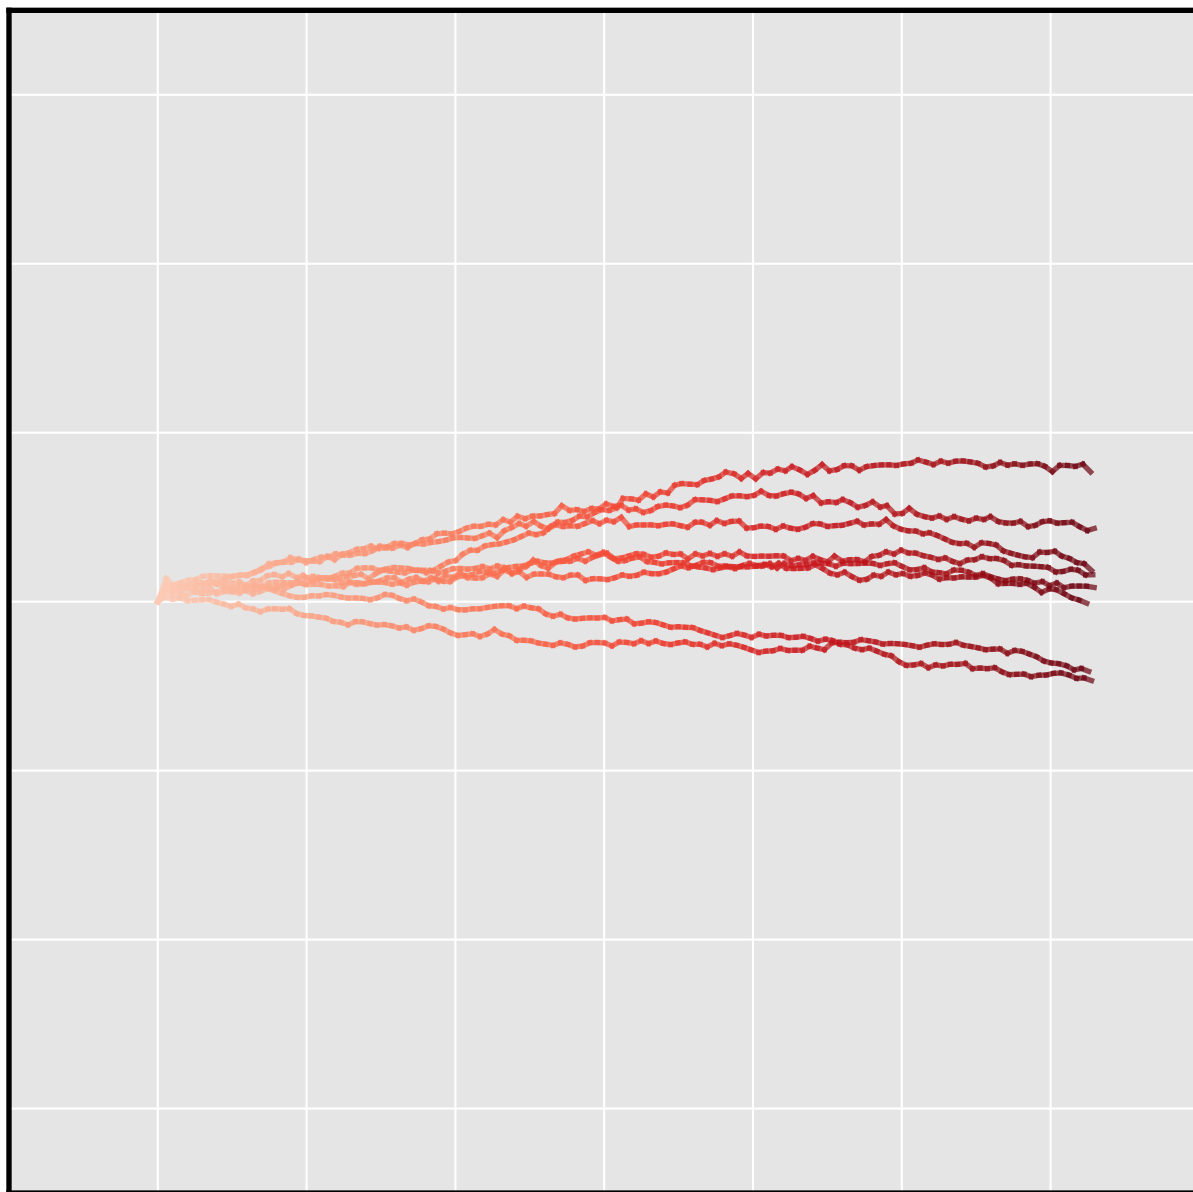

X

Supplement: supplementary_material [file samples_no_neg_grad.pdf › code/opelab/examples/simple_overlap/outputs/samples_no_neg_grad.pdf]

Y

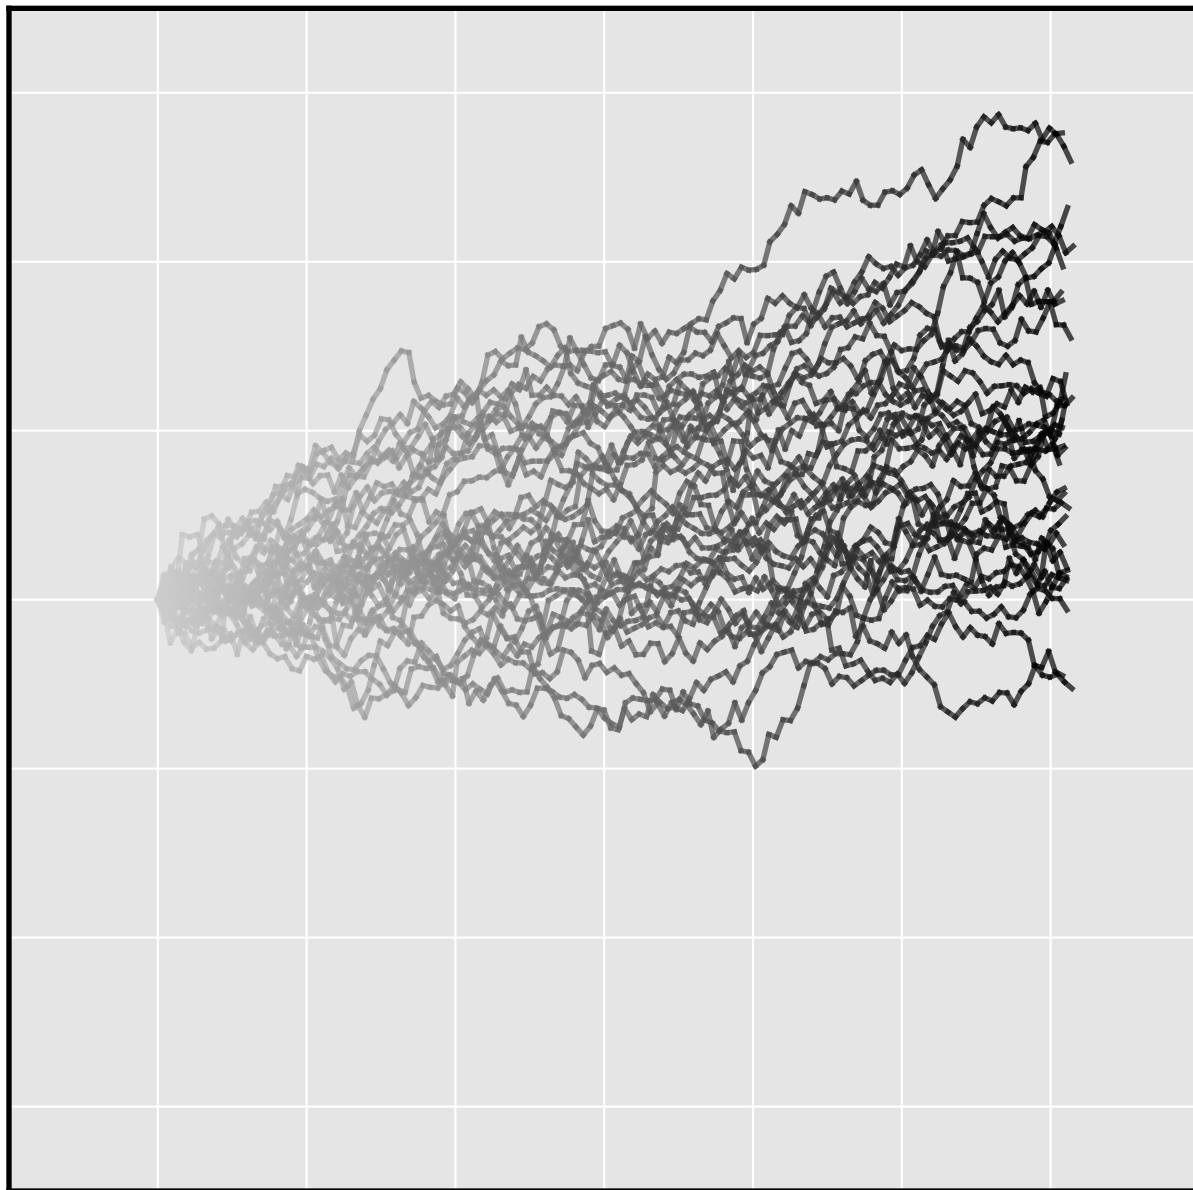

X

Supplement: supplementary_material [file training_full.pdf › code/opelab/examples/simple_overlap/outputs/training_full.pdf]

Y

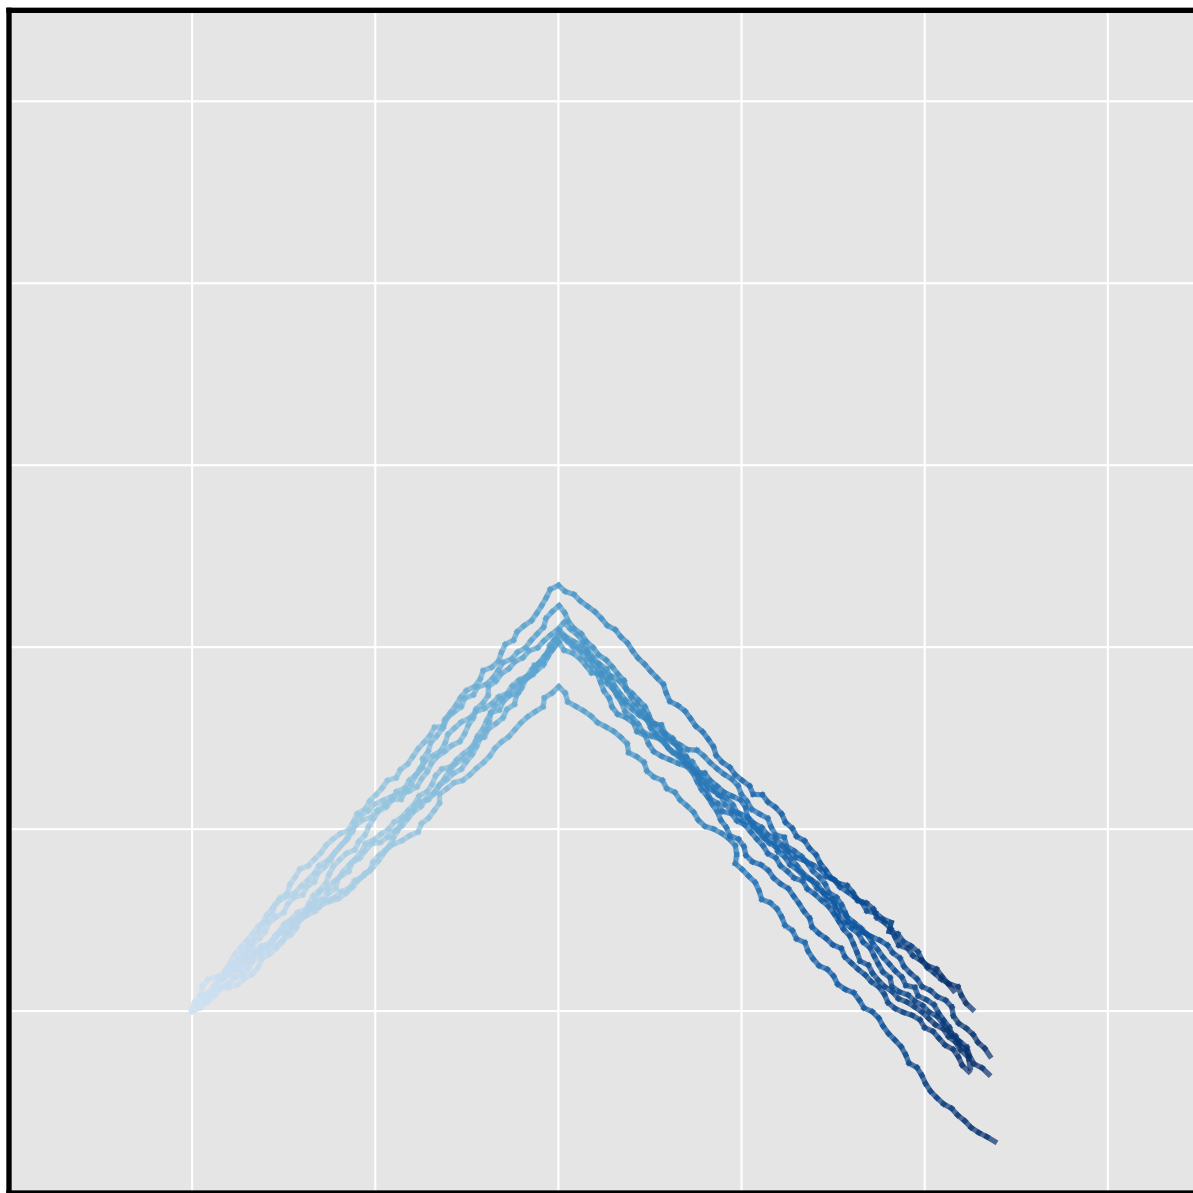

X

Supplement: supplementary_material [file expected_behavior.pdf › code/opelab/examples/simple_stitching/outputs/expected_behavior.pdf]

Y

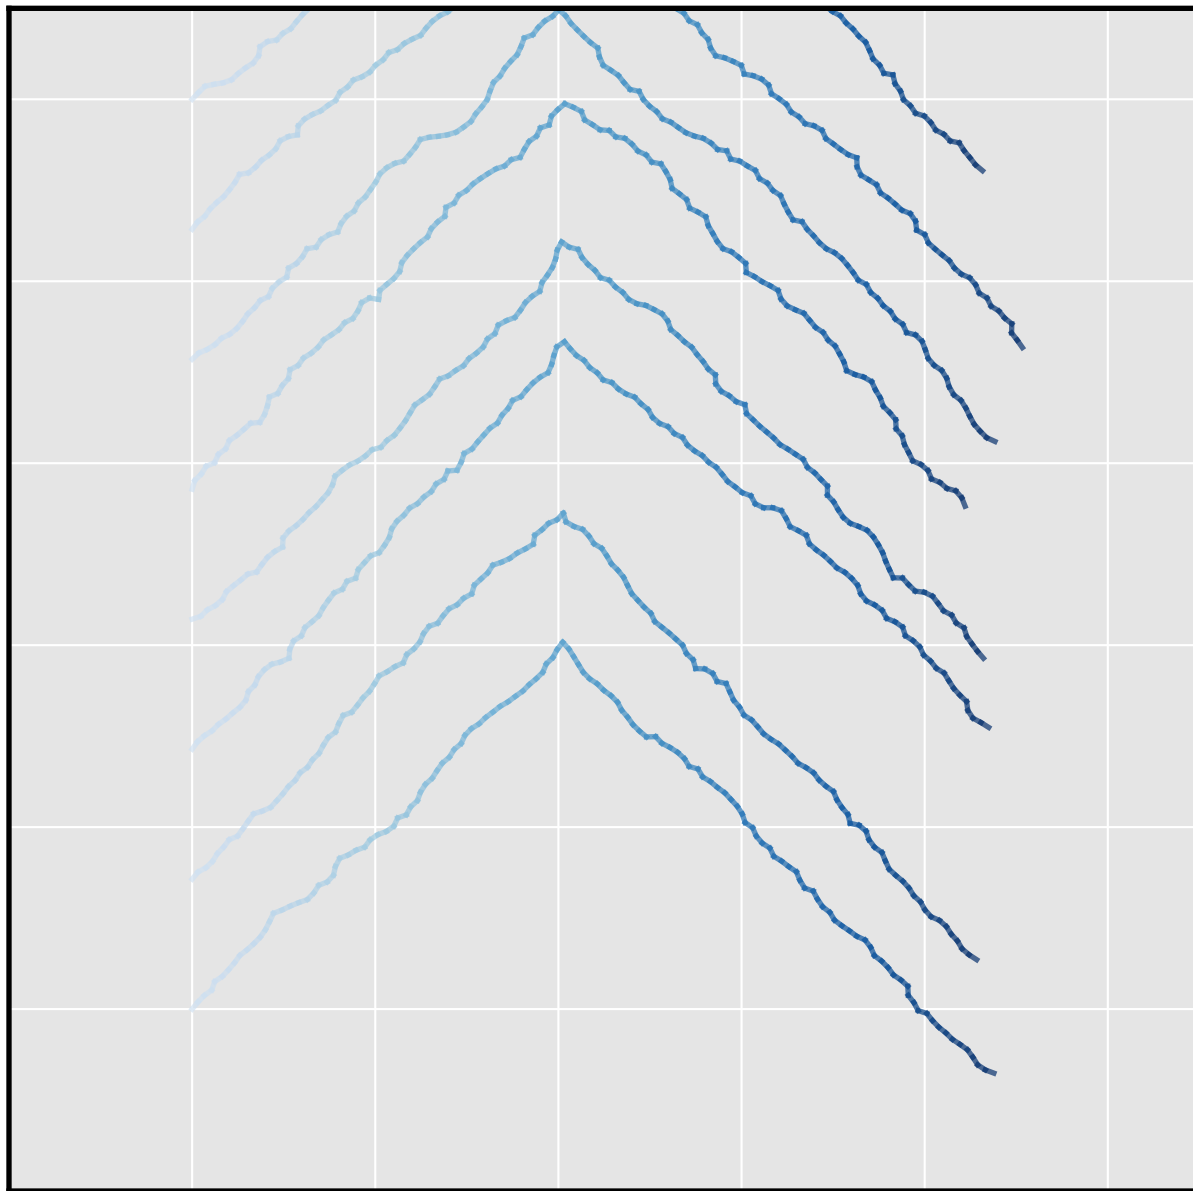

X

Supplement: supplementary_material [file expected_behavior_generalize.pdf › code/opelab/examples/simple_stitching/outputs/expected_behavior_generalize.pdf]

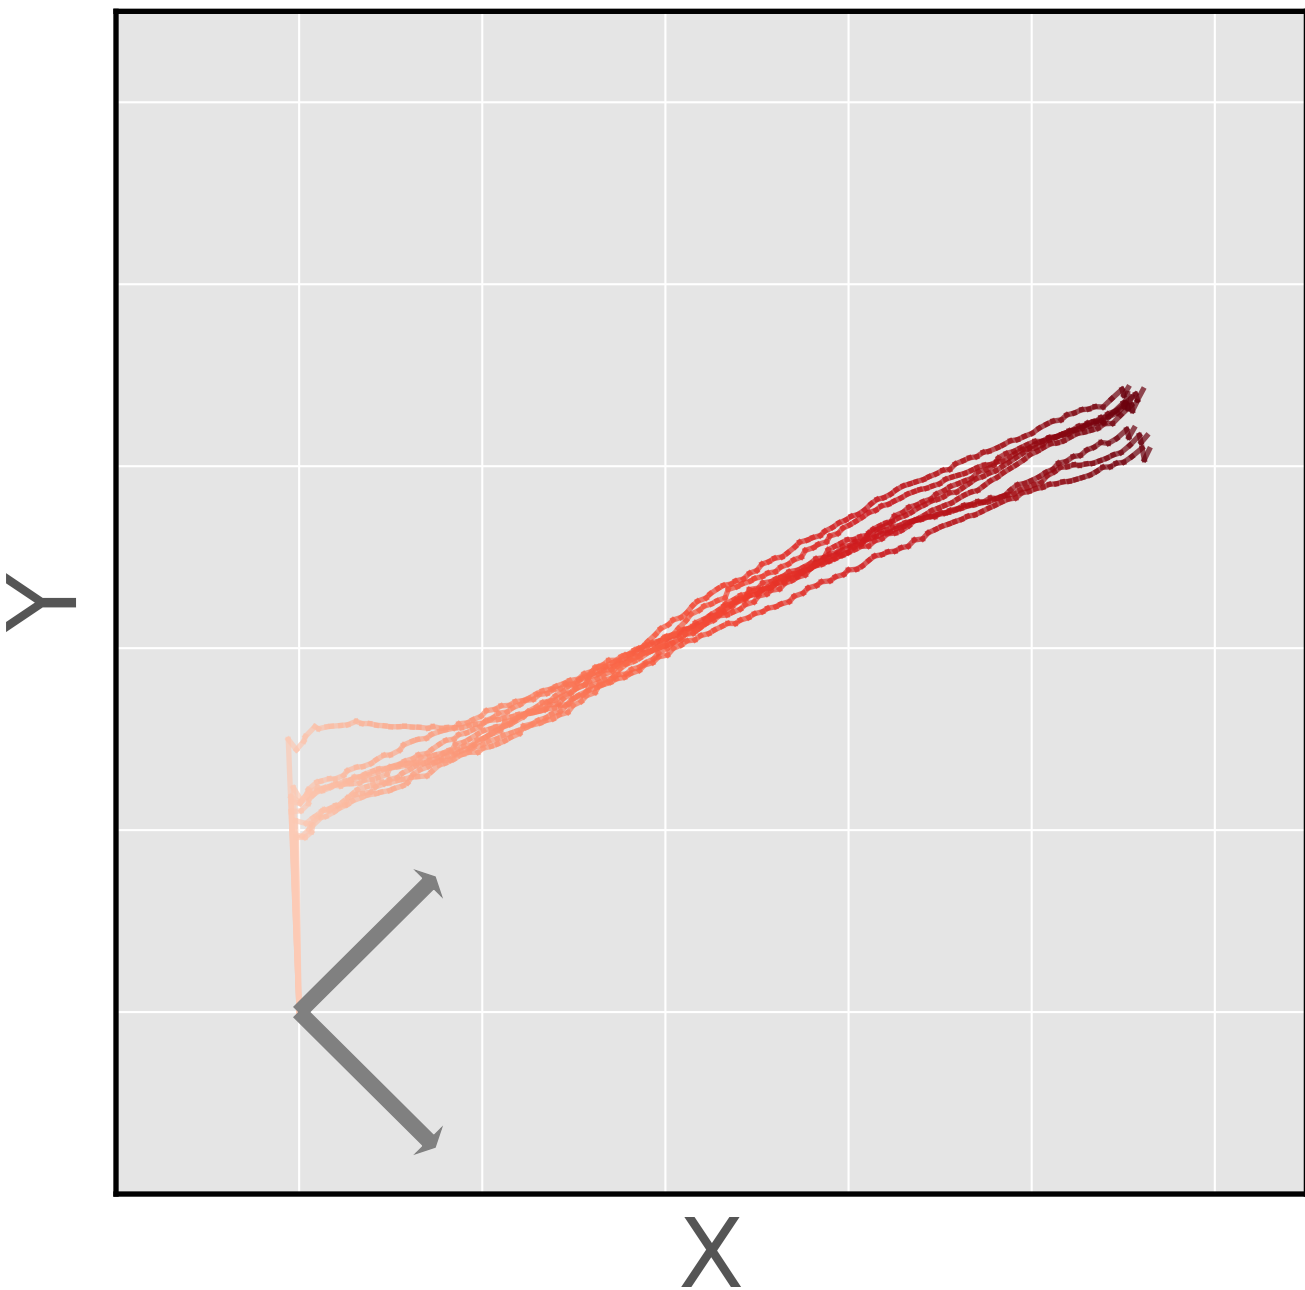

Supplement: supplementary_material [file samples_full.pdf › code/opelab/examples/simple_stitching/outputs/samples_full.pdf]

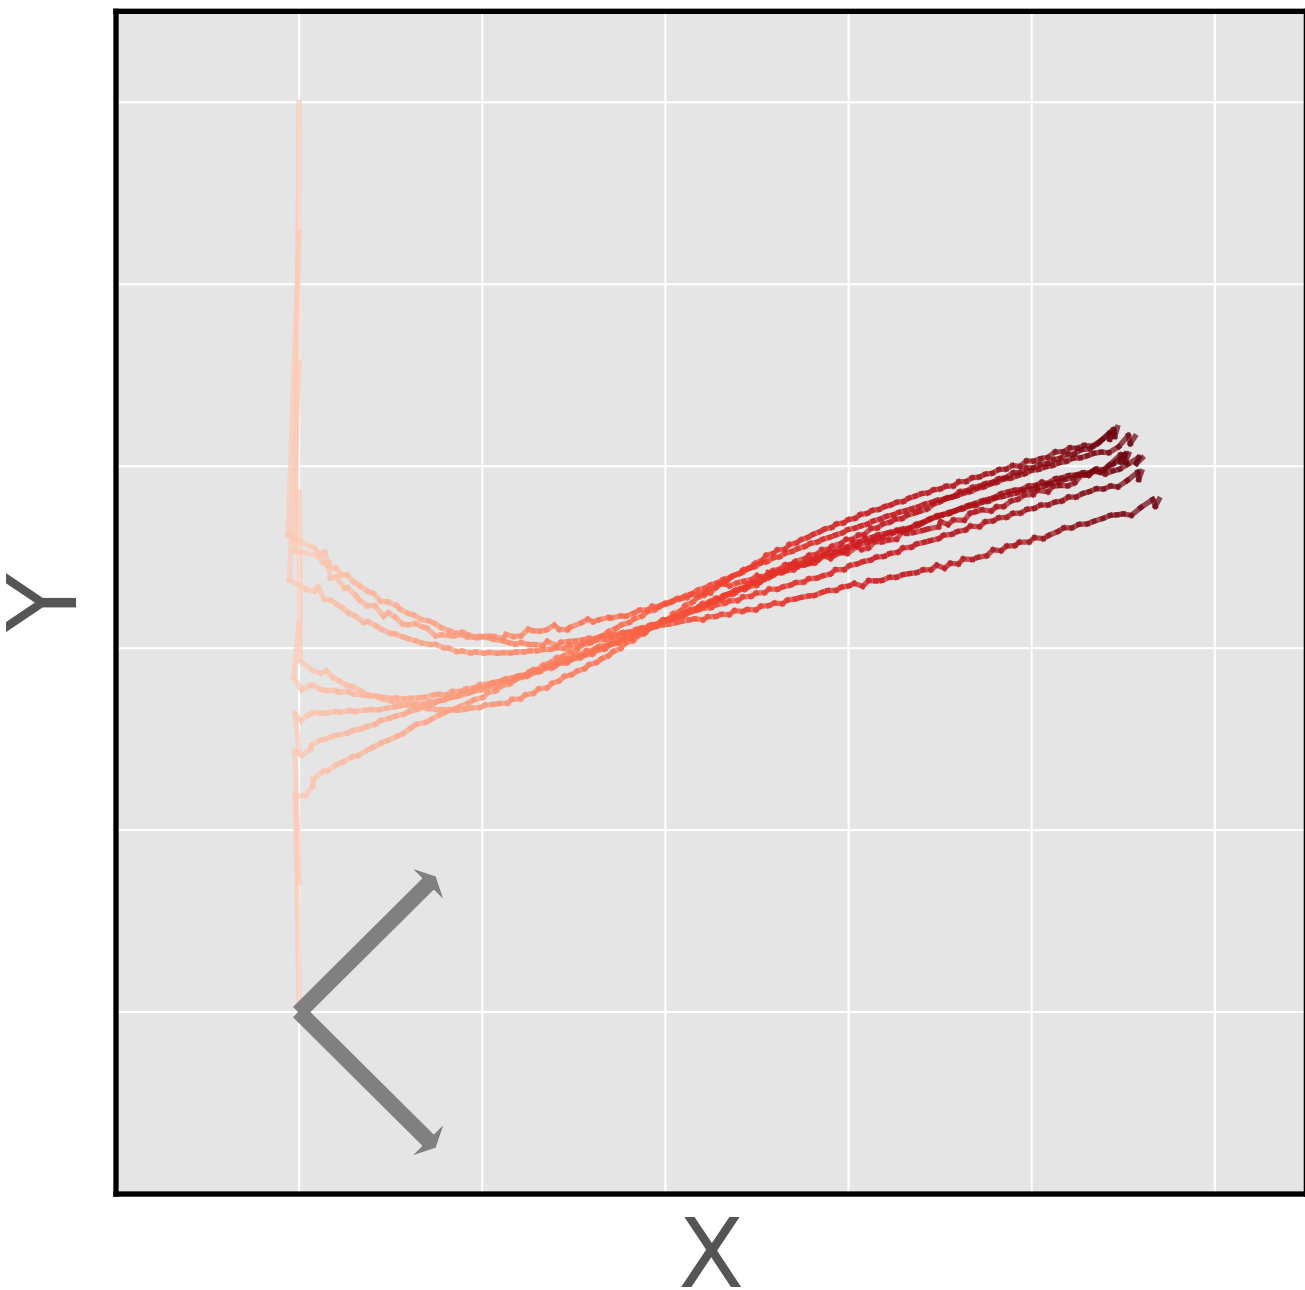

Supplement: supplementary_material [file samples_full_generalize.pdf › code/opelab/examples/simple_stitching/outputs/samples_full_generalize.pdf]

Y

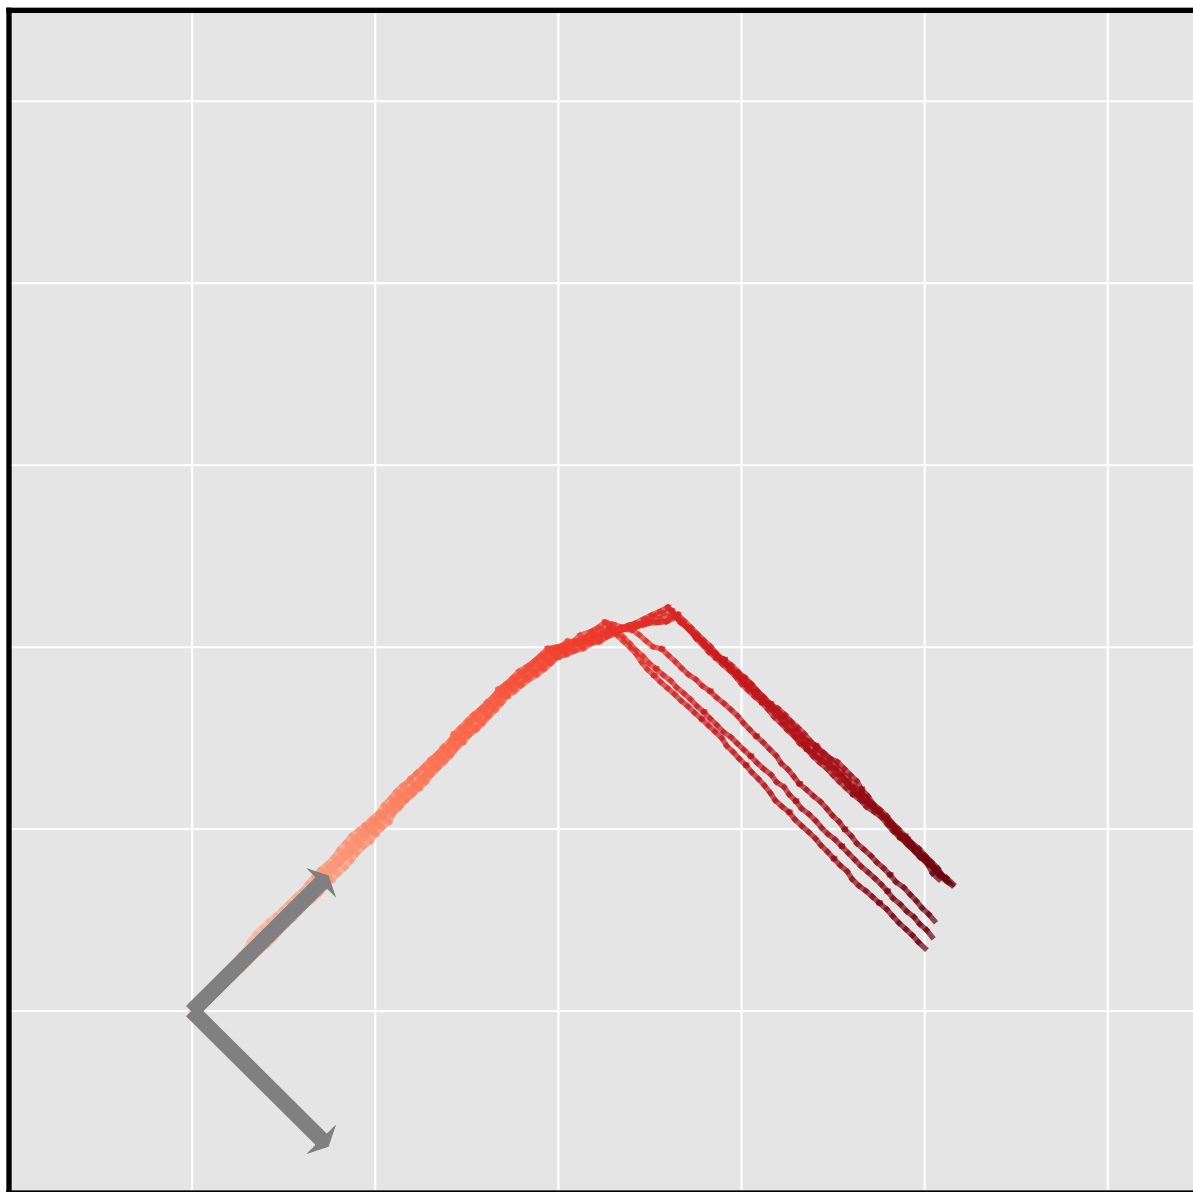

Supplement: supplementary_material [file samples_windowed.pdf › code/opelab/examples/simple_stitching/outputs/samples_windowed.pdf]

Y

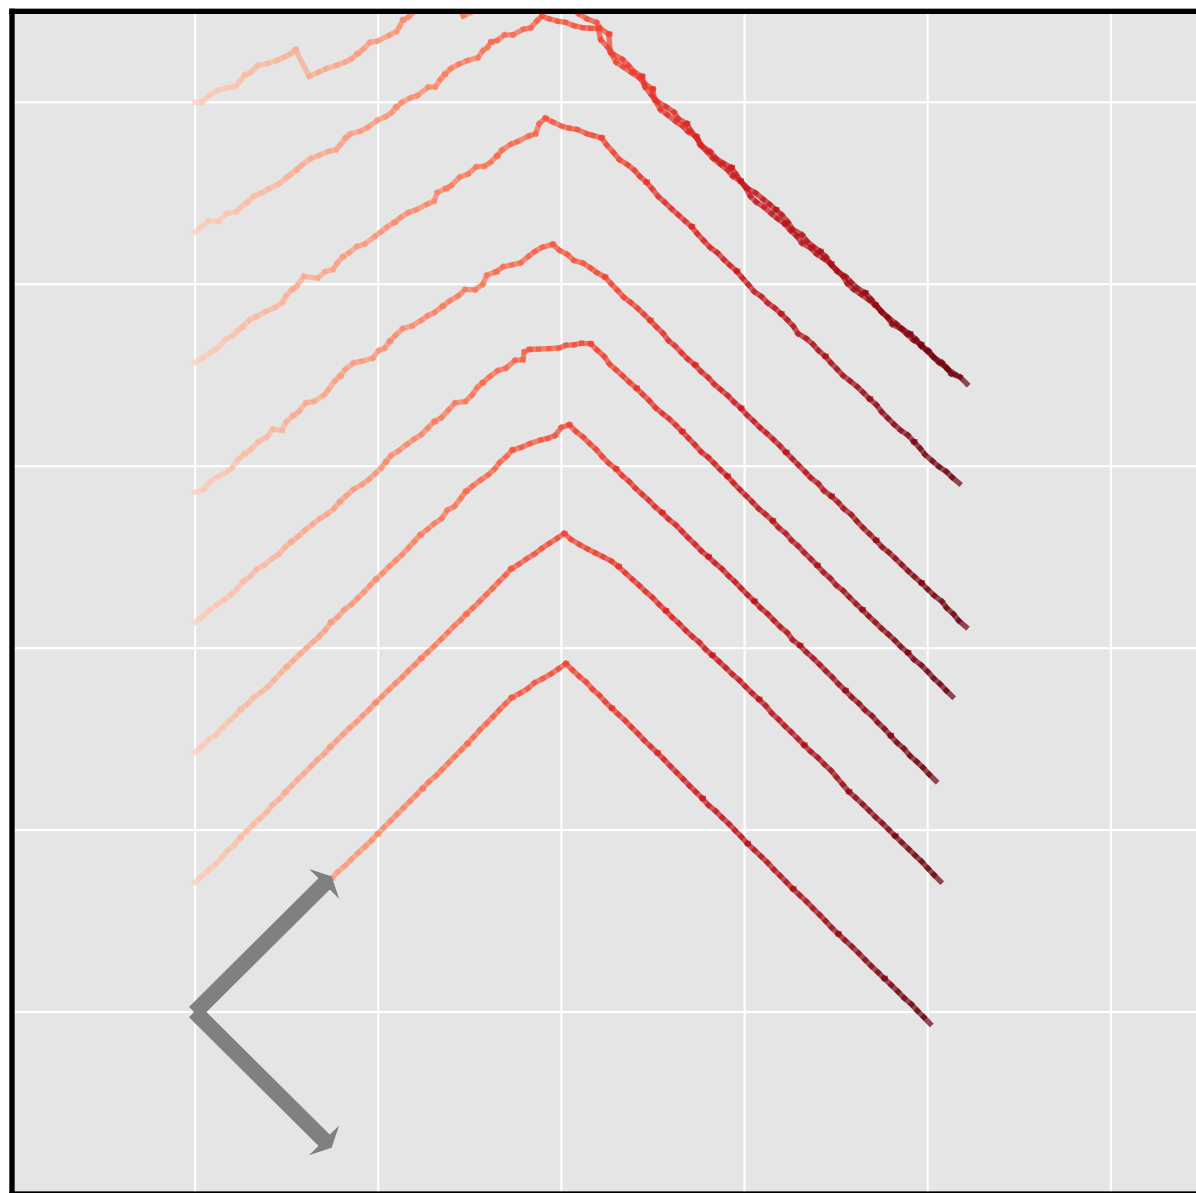

X

Supplement: supplementary_material [file samples_windowed_generalize.pdf › code/opelab/examples/simple_stitching/outputs/samples_windowed_generalize.pdf]

Y

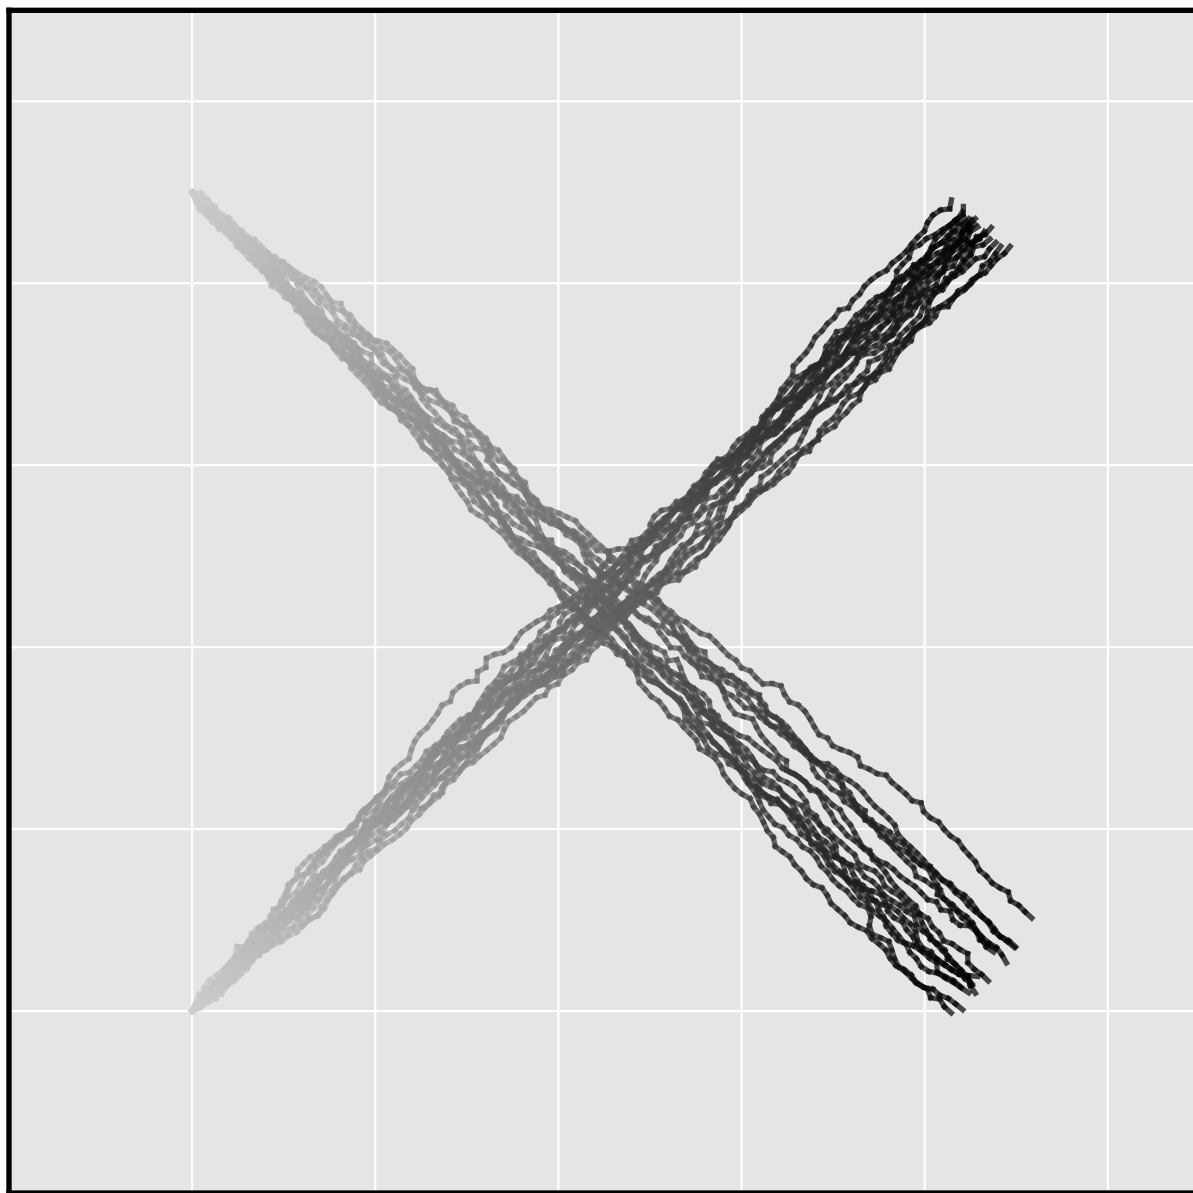

X

Supplement: supplementary_material [file training_full.pdf › code/opelab/examples/simple_stitching/outputs/training_full.pdf]
